# Supplementary material for: Dual checkpoint blockade of CD47 and LILRB1 enhances CD20 antibody-dependent phagocytosis of lymphoma cells by macrophages
Source: Front Immunol. 2022 Oct 27;13:929339. doi: 10.3389/fimmu.2022.929339 (PMC9647079; doi:10.3389/fimmu.2022.929339)
Supplement: Supplementary file 1 [file DataSheet_1.pdf]

## Supplement

**Supplementary Table 1: Statistically significant differences in the phagocytic index value and in the CD20 / HLA-A, -B, -C ratio between lymphoma cell lines<sup>1</sup>**

| Cell lines              | Phagocytic index |         | CD20 / HLA-A, -B, -C ratio |         |
|-------------------------|------------------|---------|----------------------------|---------|
|                         | p-value          | Summary | p-value                    | Summary |
| Granta 519 vs. DG-75    | 0.0015           | **      | 0.1214                     | ns      |
| Granta 519 vs. MEC2     | 0.0221           | *       | 0.9102                     | ns      |
| Granta 519 vs. Carnaval | 0.0043           | **      | 0.0001                     | ****    |
| Granta 519 vs. SU-DHL-4 | <0.0001          | ****    | 0.0001                     | ****    |
| DG-75 vs. MEC2          | 0.1703           | ns      | 0.1463                     | ns      |
| DG-75 vs. Carnaval      | <0.0001          | ****    | 0.0001                     | ****    |
| DG-75 vs. SU-DHL-4      | <0.0001          | ****    | 0.0001                     | ****    |
| MEC2 vs. Carnaval       | <0.0001          | ****    | 0.0001                     | ****    |
| MEC2 vs. SU-DHL-4       | <0.0001          | ****    | 0.0001                     | ****    |
| Carnaval vs. SU-DHL-4   | <0.0001          | ****    | 0.0001                     | ****    |

<sup>1</sup>Statistical analysis was performed with results depicted in Figure 1C using one-way ANOVA and Fisher's LSD test (ns, not significant).

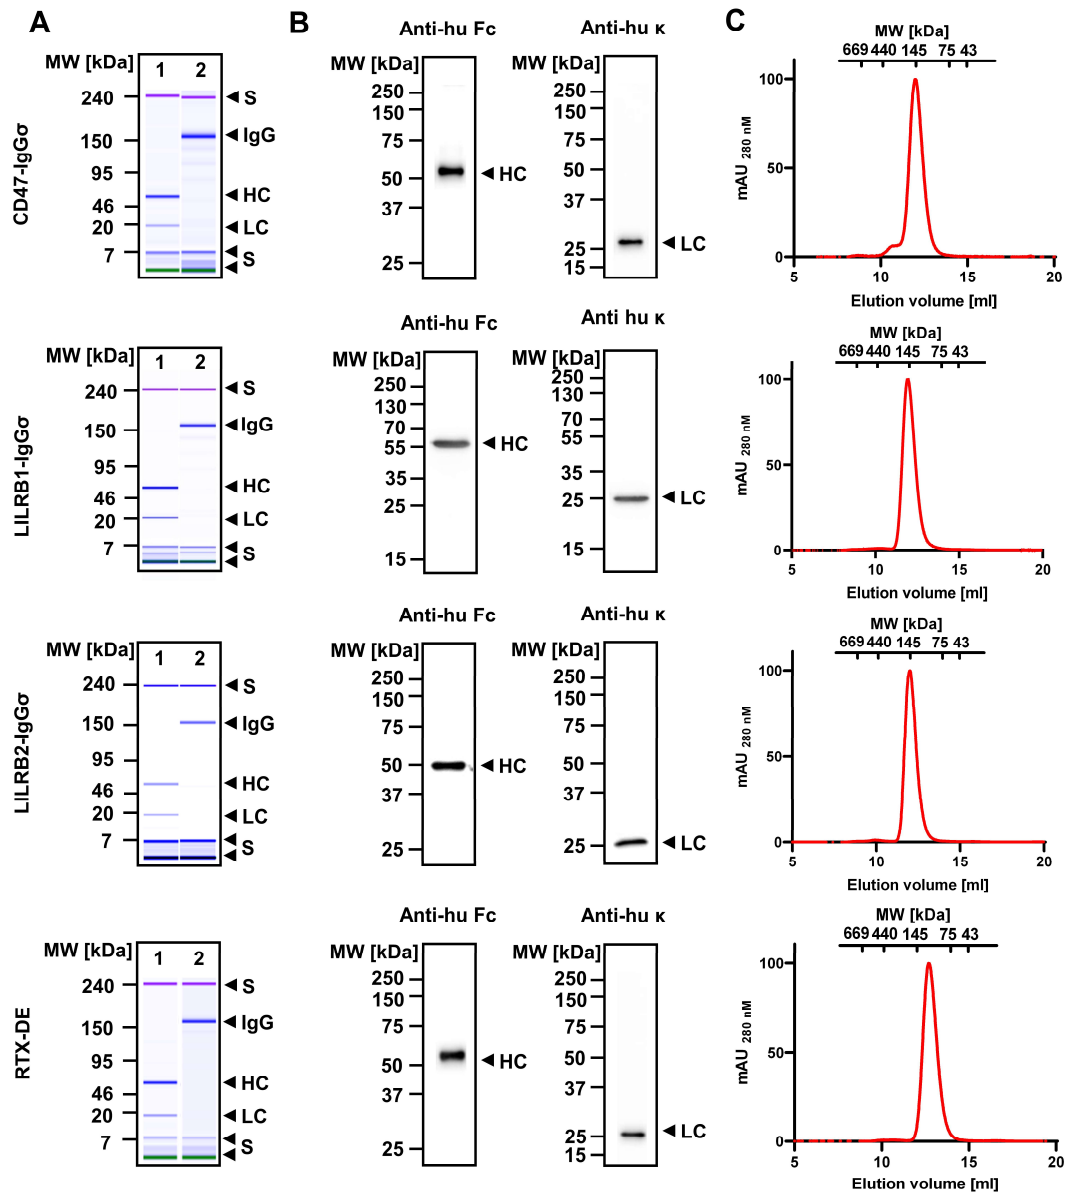

**Supplementary Figure 1: Purity, integrity and homogeneity of recombinant antibodies.** (A) The purified antibodies CD47-IgG $\sigma$ , LILRB1-IgG $\sigma$ , LILRB2-IgG $\sigma$  and RTX-DE were analyzed by microfluidic chip electrophoresis under reducing (lane 1) or non-reducing (lane 2) conditions. Four microliters of antibody preparations were loaded. Distinct protein bands were assigned to separated antibody heavy chains (HC), light chains (LC) or disulfide-bridged IgG molecules according to apparent molecular weights (MW). Upper and lower system peaks are indicated (S). (B) For Western transfer experiments, 1  $\mu$ g of purified antibodies was loaded on 12% (LILRB1-IgG $\sigma$ ) or 10% (CD47-IgG $\sigma$ , LILRB2-IgG $\sigma$  and RTX-DE) polyacrylamide gels, separated by sodium dodecyl sulfate polyacrylamide gel electrophoresis under reducing conditions, and transferred to nitrocellulose membranes. Antibody heavy (HC) and light chains (LC) were detected using horseradish-peroxidase-conjugated Fc-specific goat anti-human-IgG (anti-hu Fc) and goat anti-human  $\kappa$  light chain (anti-hu  $\kappa$ ) antibodies, respectively. (C) Antibodies CD47-IgG $\sigma$ , LILRB1-IgG $\sigma$ , LILRB2-IgG $\sigma$  and RTX-DE were analyzed by gel filtration by injecting 100 - 400  $\mu$ g of proteins. Thyroglobulin (669 kDa), ferritin (440 kDa), conalbumin (75 kDa), ovalbumin (43 kDa, all purchased from Cytiva) and trastuzumab (145 kDa) were employed as molecular weight controls.

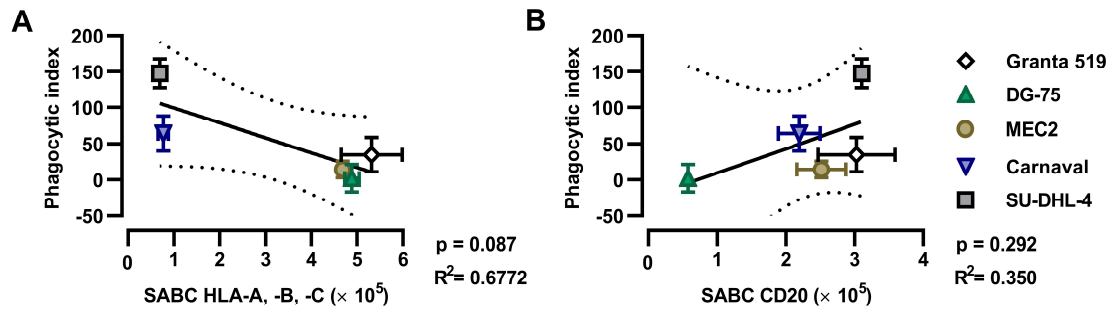

**Supplementary Figure 2: Correlation analysis of HLA class I and CD20 expression levels and sensitivity to ADCP.** The cell surface expression levels of CD20 and HLA-A, -B, -C molecules were determined for Granta 519, DG-75, MEC2, Carnaval and SU-DHL-4 cells by calibrated flow cytometry as illustrated in Figure 1. For each cell line, the specific antibody binding capacities (SABC) for HLA-A, -B, -C (**A**) and CD20 (**B**) were plotted against the calculated mean phagocytic index values for the treatment with RTX plus CD47-IgG $\sigma$ . The solid line represents the best-fit curve, dotted lines indicate the 95% confidence interval.

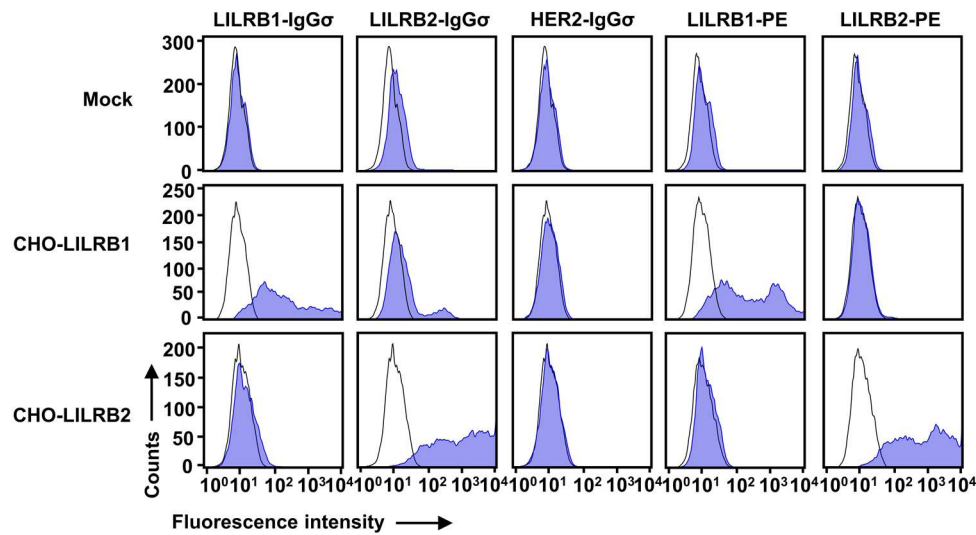

**Supplementary Figure 3: Antigen-specific binding of LILRB1-IgG $\sigma$  and LILRB2-IgG $\sigma$  antibodies.** CHO-K1 cells were transiently transfected with either LILRB1 or LILRB2 cDNA expression vectors. Thus generated CHO-LILRB1 and CHO-LILRB2 cells, respectively, as well as mock transfected CHO-K1 cells (Mock) were incubated in buffer only or in the presence of antibodies LILRB1-IgG $\sigma$ , LILRB2-IgG $\sigma$  or HER2-IgG $\sigma$ , as indicated. Each antibody was analyzed at a concentration of 50  $\mu$ g/ml. Secondary PE-conjugated F(ab')<sub>2</sub> fragments of goat anti-human Fc $\gamma$  region antibodies were employed for detection. Purchased PE-conjugated anti-LILRB1 (LILRB1-PE) and anti-LILRB2 (LILRB2-PE) antibodies were used to verify efficient cell surface expression of LILRB1 and LILRB2 antigens, respectively. Antibody binding was analyzed by flow cytometry (black outlined peak: signal from buffer control, blue shaded peak: signals from antibodies, as indicated). Representative results from one out of three performed experiments are shown.

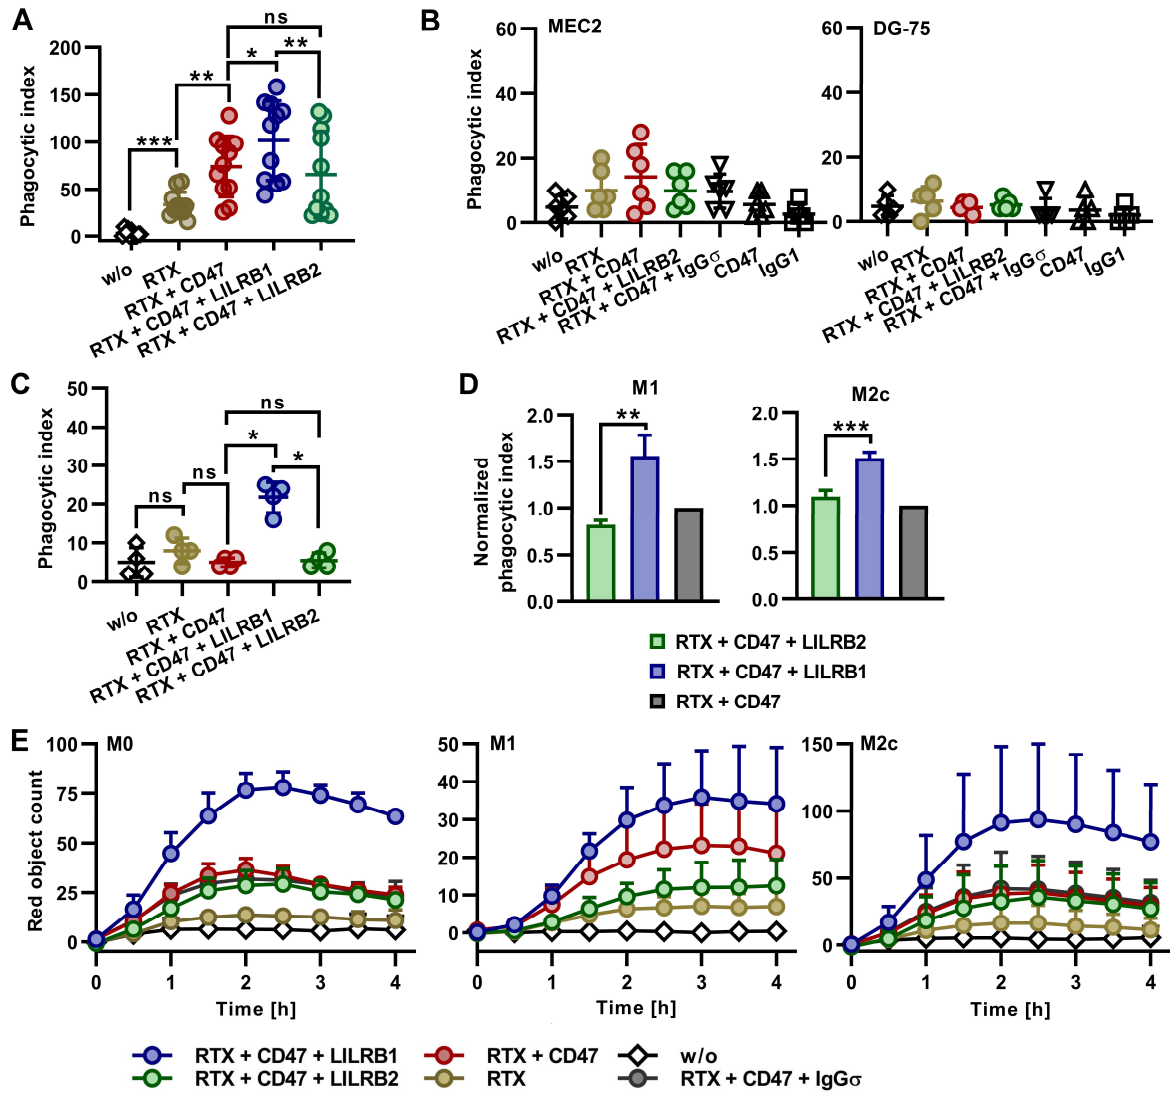

**Supplementary Figure 4: LIRB2-IgG $\sigma$  does not promote ADCP of lymphoma cells by macrophages.** (A) LILRB1-IgG $\sigma$  (LILRB1) or LILRB2-IgG $\sigma$  (LILRB2) were combined with rituximab (RTX) and CD47-IgG $\sigma$  (CD47) in 2 h ADCP assays with CFSE-labeled Carnaival cells and M0 macrophages (E:T cell ratio: 1:2). Phagocytic index values were determined by fluorescence microscopy. Antibodies were analyzed at a concentration of 10  $\mu$ g/ml. Data points represent results from individual experiments with macrophages from different donors. Horizontal lines indicate mean values  $\pm$  SD (w/o, without added antibody; \*,  $P \leq 0.05$ ; \*\*,  $P \leq 0.01$ ; \*\*\*,  $P \leq 0.001$ ; ns, not significant; one-way ANOVA with Šidák's post-hoc test;  $n = 11$ ). (B) ADCP of CFSE-labeled MEC2 ( $n = 6$ ) or DG-75 ( $n = 5$ ) lymphoma cells was analyzed with M0 macrophages without addition of an antibody (w/o) or with antibodies RTX, CD47-IgG $\sigma$ , LILRB2-IgG $\sigma$ , HER2-IgG $\sigma$  (IgG $\sigma$ ) or trastuzumab (IgG1; each at a concentration of 10  $\mu$ g/ml) by fluorescence microscopy. (C) LILRB1-IgG $\sigma$  and LILRB2-IgG $\sigma$  were each combined with RTX and CD47-IgG $\sigma$  in 2 h ADCP assays with DG-75 cells and M0 macrophages. Antibodies were analyzed at a concentration of 10  $\mu$ g/ml (\*,  $P \leq 0.05$ ; ns, not significant; one-way ANOVA with Šidák's post-hoc test;  $n = 4$ ). (D) M1 and M2c macrophages were incubated with CFSE-labeled Carnaival cells and the antibodies RTX, CD47-IgG $\sigma$  (CD47), LILRB2-IgG $\sigma$  (LILRB2) and LILRB1-IgG $\sigma$  (LILRB1) as assigned, each applied at a concentration of 10  $\mu$ g/ml. Mean phagocytic index values by antibody triple combinations were normalized to ADCP induced by RTX + CD47-IgG $\sigma$ . Bars indicate mean values  $\pm$  SD (\*\*,  $P \leq 0.01$ , \*\*\*,  $P \leq 0.001$ ; one-way ANOVA with Šidák's post-hoc test). (E) DG-75 lymphoma cells were labeled with pHrodo<sup>®</sup> and analyzed as target cells for M0, M1 or M2c macrophages in the absence (w/o) or in the presence of RTX alone or in combination with IgG $\sigma$  antibodies against CD47, LILRB1, LILRB2 or HER2 (IgG $\sigma$ ) as indicated (concentration: 10  $\mu$ g/ml). Data points represent mean values of red object count per image  $\pm$  SD ( $n = 3$ ). The E:T cell ratio was 1:2.

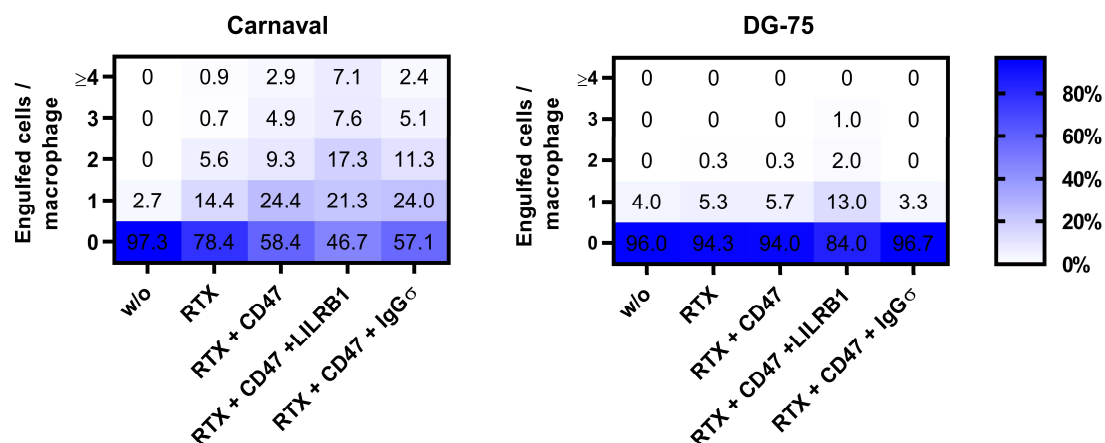

**Supplementary Figure 5: Single and multiple ADCP of Carnaval and DG-75 cells.** CFSE-labeled Carnaval ( $n = 9$ ) or DG-75 cells ( $n = 6$ ) were incubated with M0 macrophages in the absence (w/o) or in the presence of antibodies rituximab (RTX), CD47-IgG $\sigma$  (CD47), LILRB1-IgG $\sigma$  (LILRB1) or HER2-IgG $\sigma$  (IgG $\sigma$ ) as indicated (antibody concentration: 10  $\mu$ g/ml). After 2 h, the number of engulfed lymphoma cells by individual macrophages was determined. Heat maps indicate the percentage of macrophages grouped according to numbers of engulfed lymphoma cells.

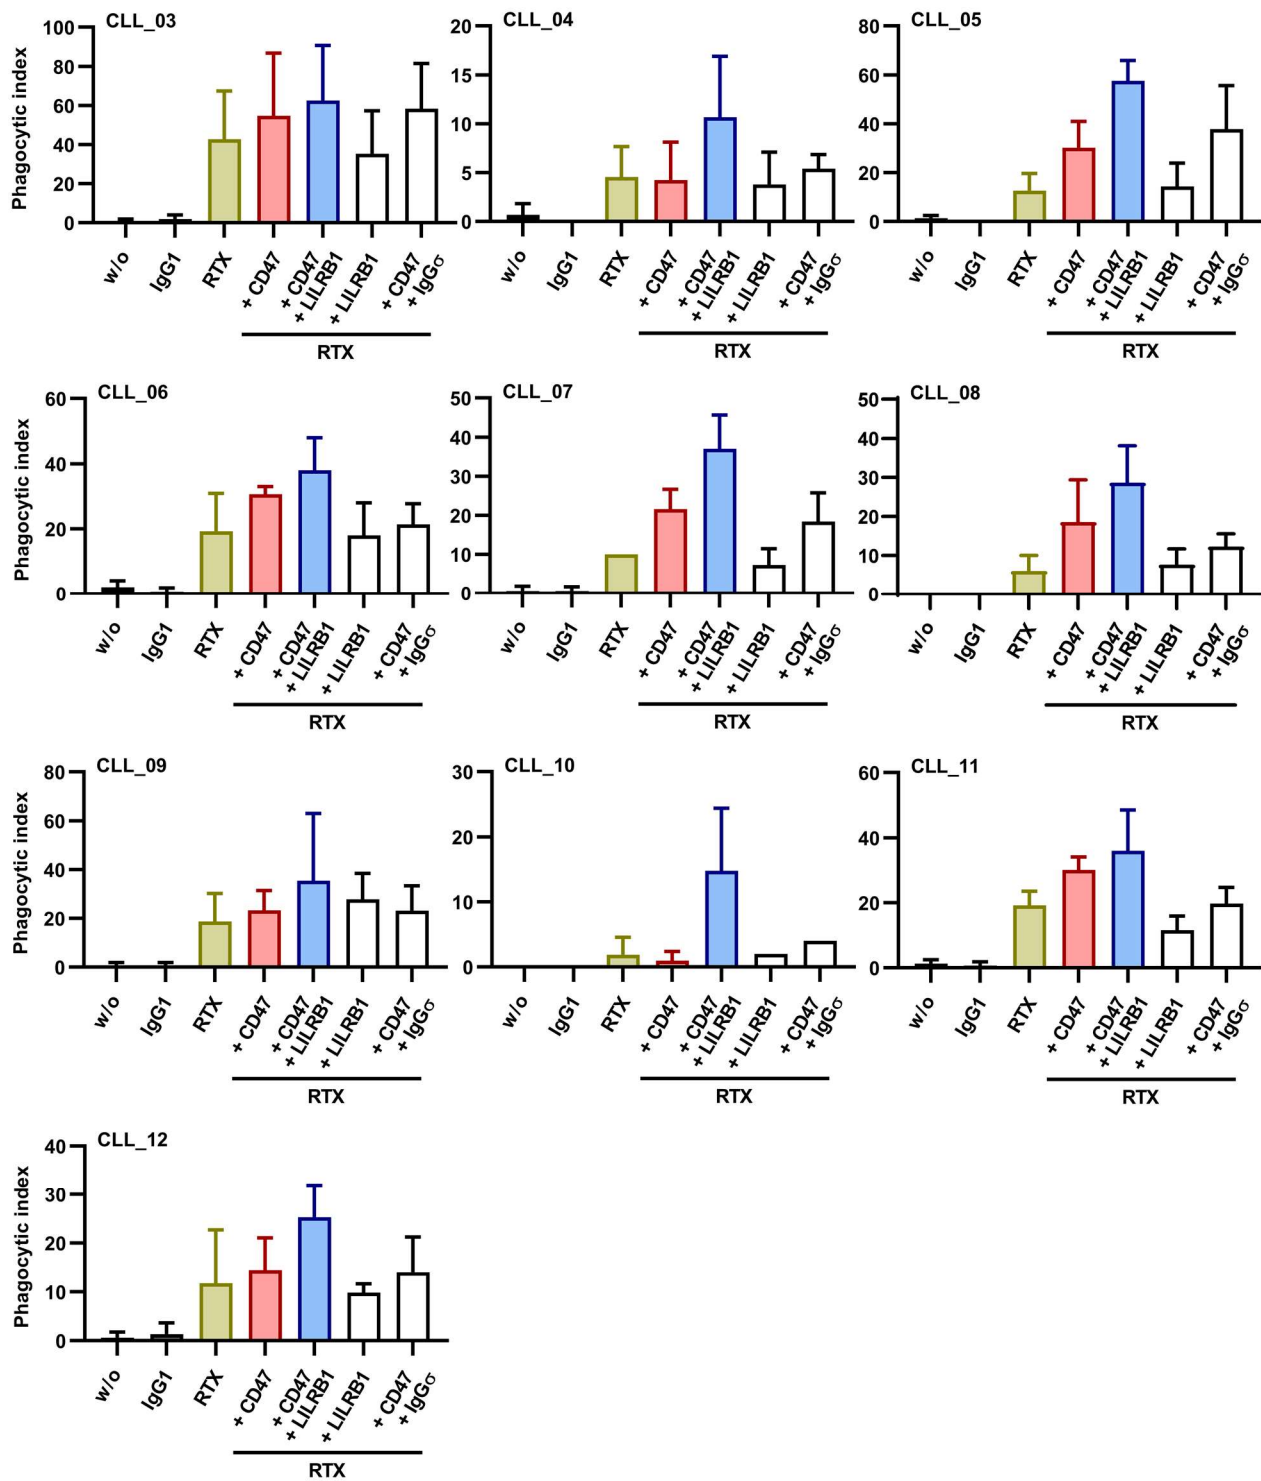

**Supplementary Figure 6: ADCP of patient CLL cells.** CFSE-labeled CLL cells isolated from the peripheral blood of different patients were incubated with M0 macrophages (E:T cell ratio: 1:2) in the absence (w/o) or in the presence of antibodies trastuzumab (IgG1), rituximab (RTX), LILRB1-IgGσ (LILRB1), CD47-IgGσ (CD47) or HER2-IgGσ (IgGσ) as indicated. Each antibody was analyzed at a concentration of 10 μg/ml. After 2 h, ADCP was determined by fluorescence microscopy. Data points represent mean phagocytic index values ± SD from independent experiments using macrophages from two (CLL\_10) or three different donors (all other samples).
